# Supplementary material
Source: publisher site journal article supplement (https://www.dovepress.com/article/429096)
Supplement: Supplementary file 1 [file get_supplementary_file.php]

| Case | 1 | 2 | 3 | 4 | 5 | 6 | 7 | 8 | 9 |
| --- | --- | --- | --- | --- | --- | --- | --- | --- | --- |
| Age | 68 | 41 | 85 | 86 | 53 | 76 | 43 | 70 | 37 |
| Gender | Male | Male | Male | Male | Male | Female | Male | Female | Male |
| NAYA | III | III | IV | IV | III | III | IV | III | II |
| 6MW | 392.3 | 400.3 | 274.5 | 293.2 | 372.6 | 315.8 | 224.5 | 412.2 | 424.6 |
| EF | 39 | 34 | 33 | 38 | 30 | 39 | 36 | 35 | 35 |
| IVSD | 9 | 9 | 9 | 9 | 11 | 9 | 11 | 8 | 11 |
| LVDd | 54 | 66 | 68 | 61 | 55 | 68 | 66 | 50 | 70 |
| LVDs | 43 | 55 | 57 | 49 | 46 | 58 | 53 | 41 | 58 |
| BNP | 141.74 | 200.23 | 161.2 | 953.27 | 151.51 | 340.62 | 120.18 | 857.7 | 80.74 |
| TG | 1.25 | 1.24 | 0.94 | 0.89 | 4.28 | 1.17 | 0.66 | 1.78 | 2.19 |
| TC | 5.68 | 4.27 | 3.96 | 2.53 | 4.74 | 4.38 | 6.51 | 5.39 | 4.75 |
| LDL | 3.14 | 2.73 | 2.36 | 1.51 | 2.64 | 2.42 | 4.11 | 3.58 | 2.56 |
| Cr | 62.6 | 92.1 | 75.6 | 90.8 | 83.8 | 63 | 90.3 | 87 | 69.5 |
| Smoking | No | No | Yes | Yes | Yes | No | Yes | No | No |
| Hypertension | No | Yes | Yes | No | Yes | No | Yes | No | Yes |
| Coronary Artery Disease | Yes | Yes | Yes | No | Yes | No | Yes | Yes | No |

**Supplementary Table 1.** Before treatment group raw data

**Supplementary Table 2.** After 2months of treament group raw data

| Case | 6MWT | EF | IVSD | LVDd | LVDs |
| --- | --- | --- | --- | --- | --- |
| 1 | 436.7 | 44 | 10 | 53 | 42 |
| 2 | 452.4 | 37 | 11 | 57 | 47 |
| 3 | 346 | 43 | 9 | 61 | 48 |
| 4 | 464.2 | 41 | 9 | 59 | 47 |
| 5 | 463.3 | 32 | 11 | 55 | 45 |
| 6 | 315.9 | 37 | 9 | 68 | 57 |
| 7 | 234.7 | 38 | 13 | 62 | 51 |
| 8 | 436.6 | 33 | 9 | 56 | 45 |
| 9 | 429 | 38 | 10 | 68 | 53 |

**Supplementary Table 3.** After 6months of treament group raw data

| Case | 6MWT | EF | IVSD | LVDd | LVDs |
| --- | --- | --- | --- | --- | --- |
| 1 | 363.8 | 46 | 10 | 50 | 37 |
| 2 | 419.5 | 40 | 11 | 55 | 44 |
| 3 | 480.4 | 48 | 8 | 51 | 35 |
| 4 | 474.8 | 41 | 9 | 55 | 43 |
| 5 | 429.4 | 34 | 11 | 52 | 42 |
| 6 | 232.4 | 41 | 9 | 61 | 50 |
| 7 | 469.9 | 55 | 13 | 52 | 37 |
| 8 | 593.6 | 40 | 9 | 51 | 41 |
| 9 | 505.7 | 44 | 9 | 62 | 48 |


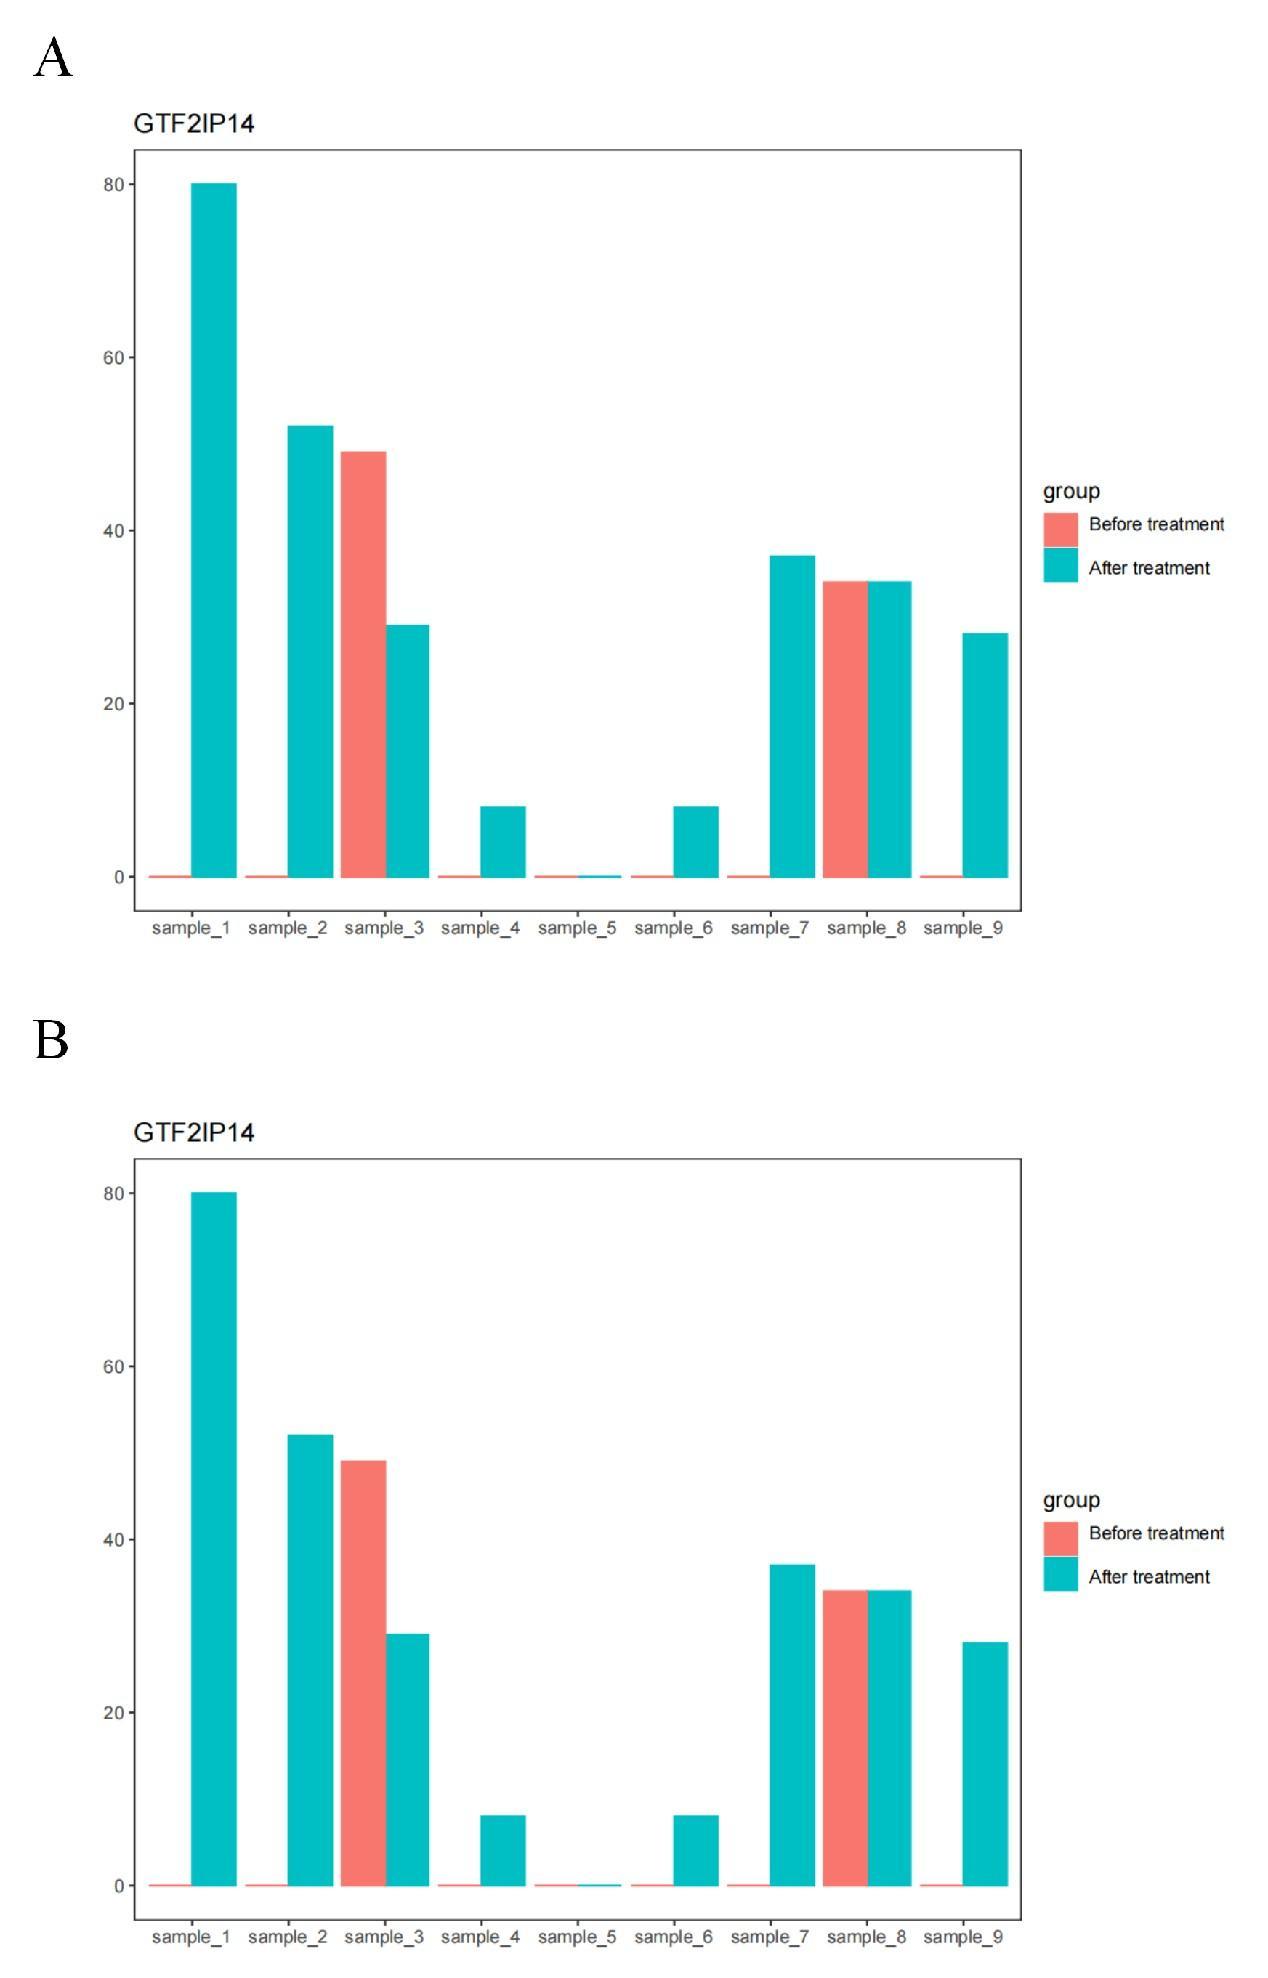


**Supplementary Figure 1.** GTF2IP14 and MTLN expression in each patient before and after treatments. A. GTF2IP14 expression in each patient before treatment; B. MTLN expression in each patient before treatment.
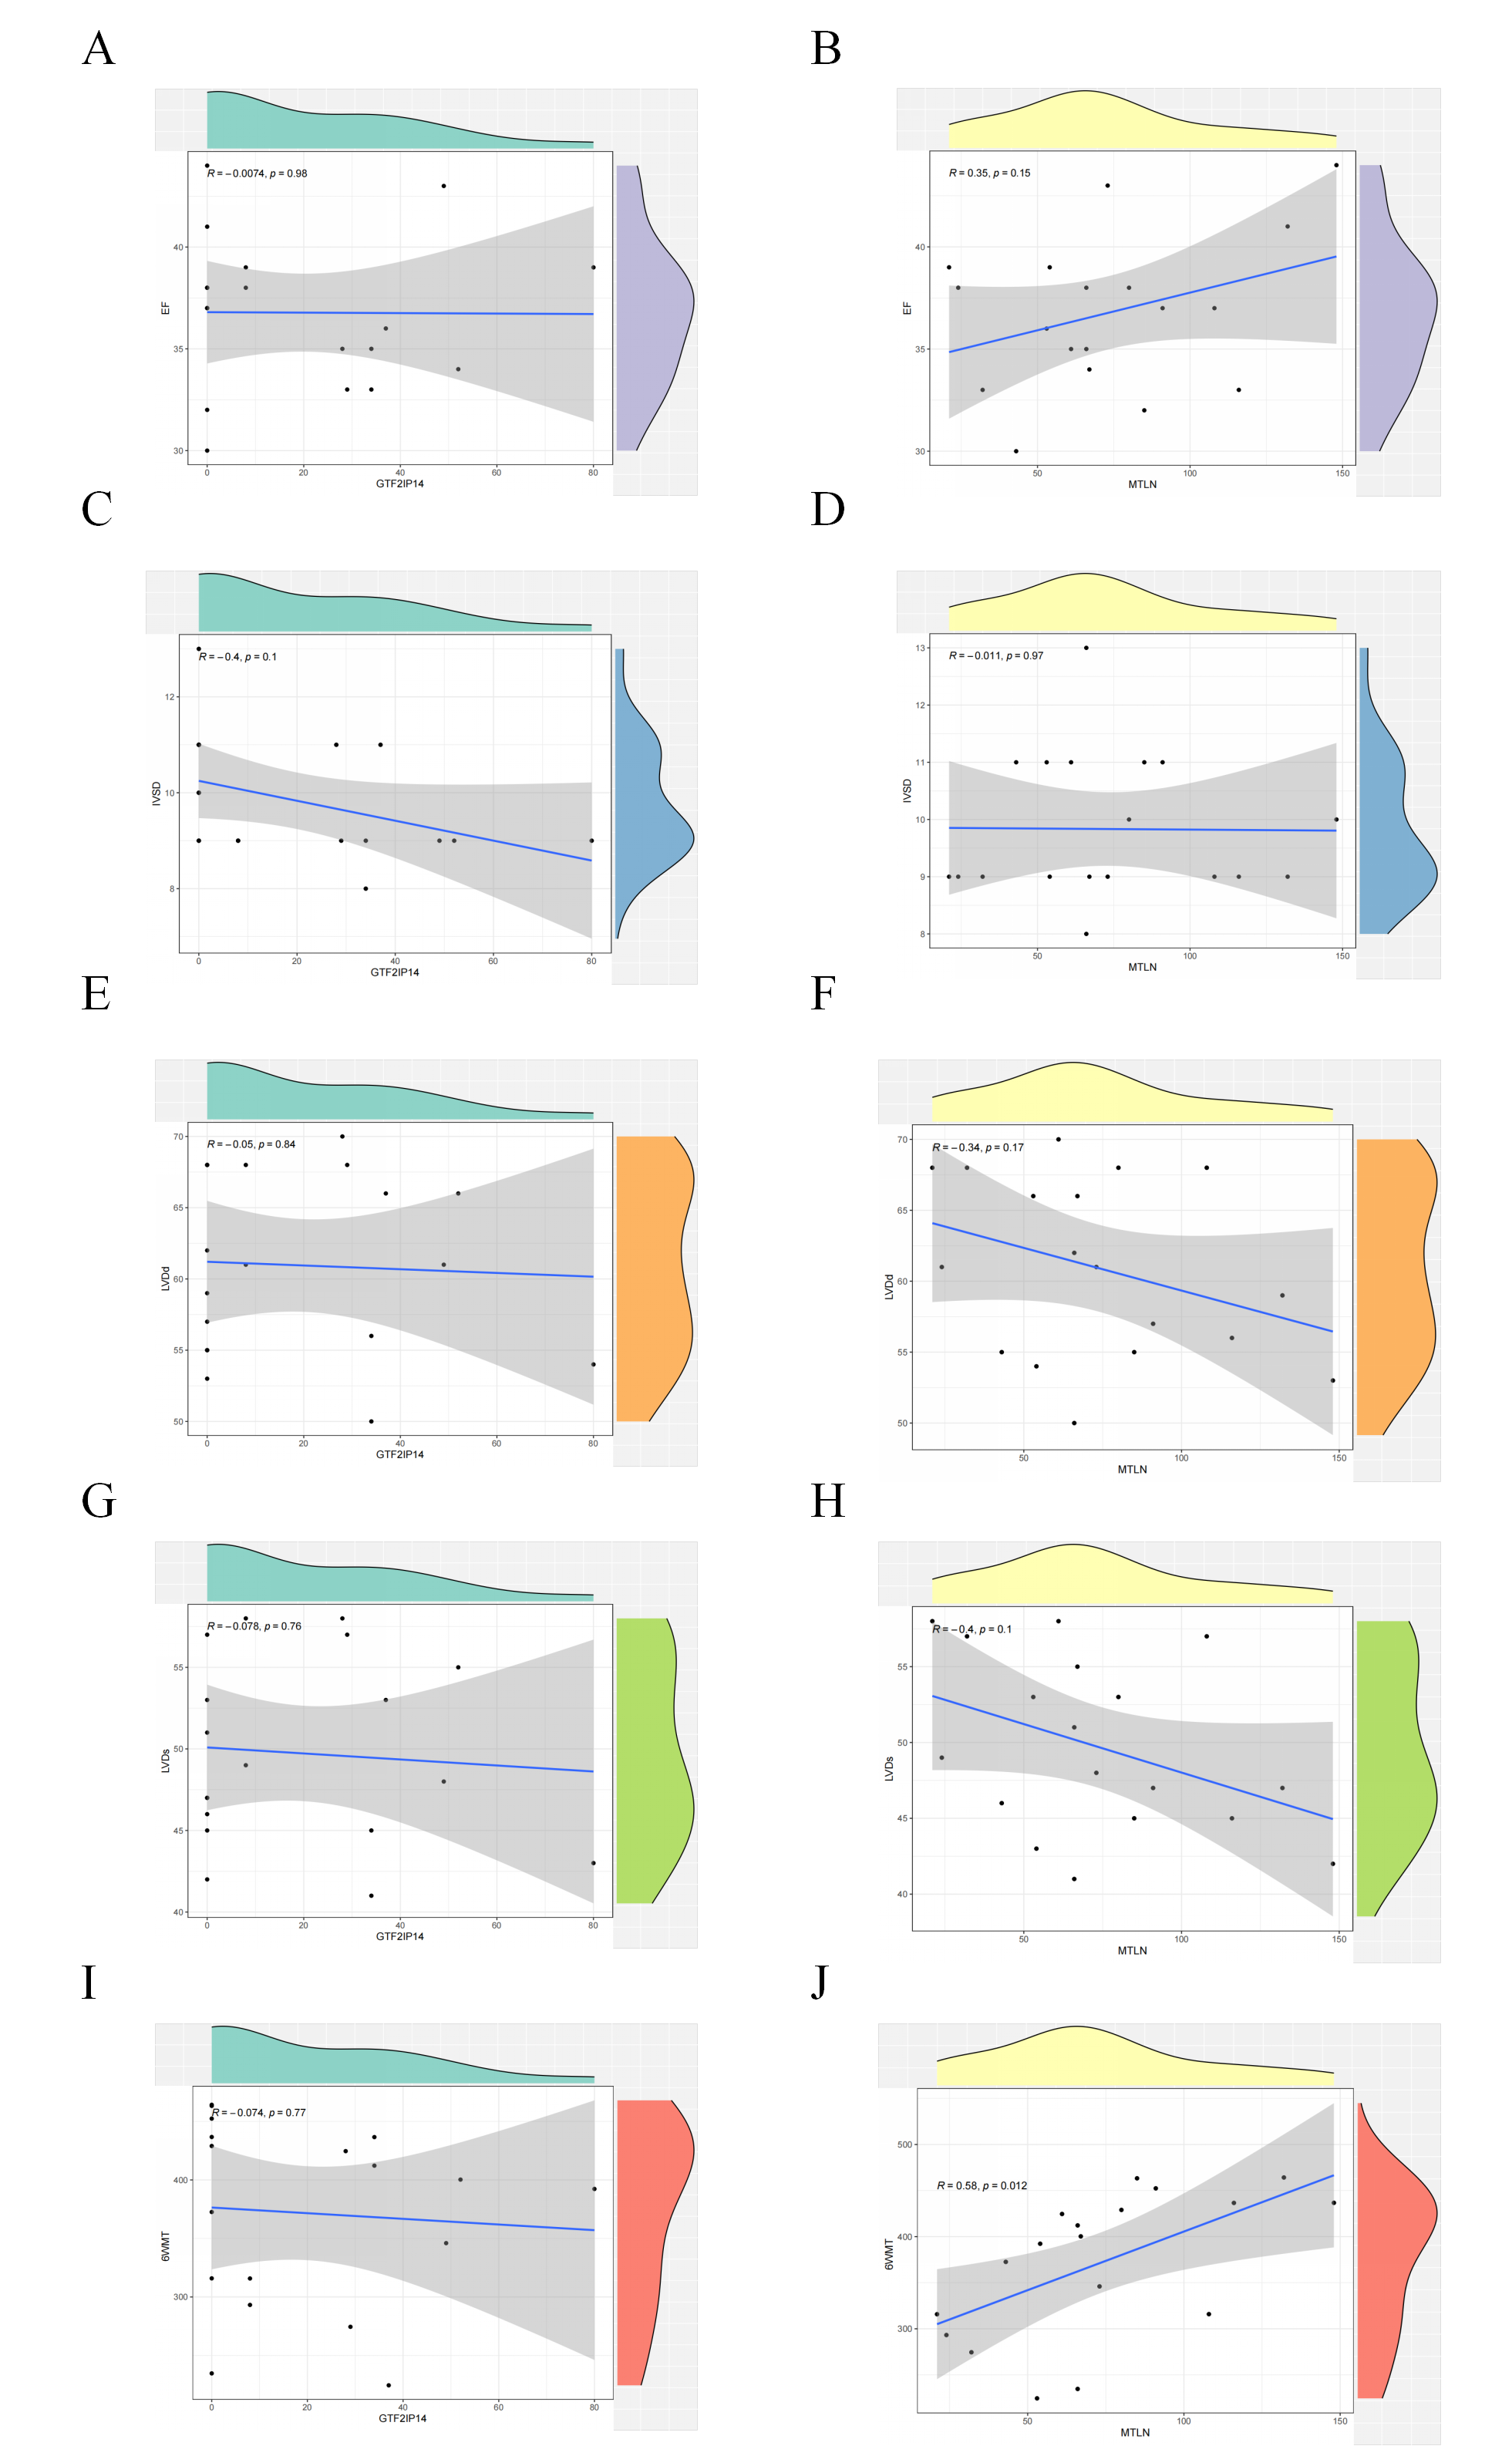

**Supplementary Figure 2.** Correlation analysis of echocardiography and hub genes (GTF2IP14 and MTLN). A、C、E、G: Scatter plot of correlation between GTF2IP14 and cardiac ultrasound indices; B、D、F、H: Scatter plot of correlation between MTLN and cardiac ultrasound indices; I. Scatter plot of the correlation between GTF2IP14 and 6MWT; J.Scatter plot of the correlation between MTLN and 6MWT.
